# Supplementary material for: Novel functions of the ubiquitin-independent proteasome system in regulatingXenopusgermline development
Source: Oxford University Press journal article supplement (doi:10.1242/dev.172700), 2019-01-01
Supplement: dev172700supp.pdf [file dev172700supp.pdf]

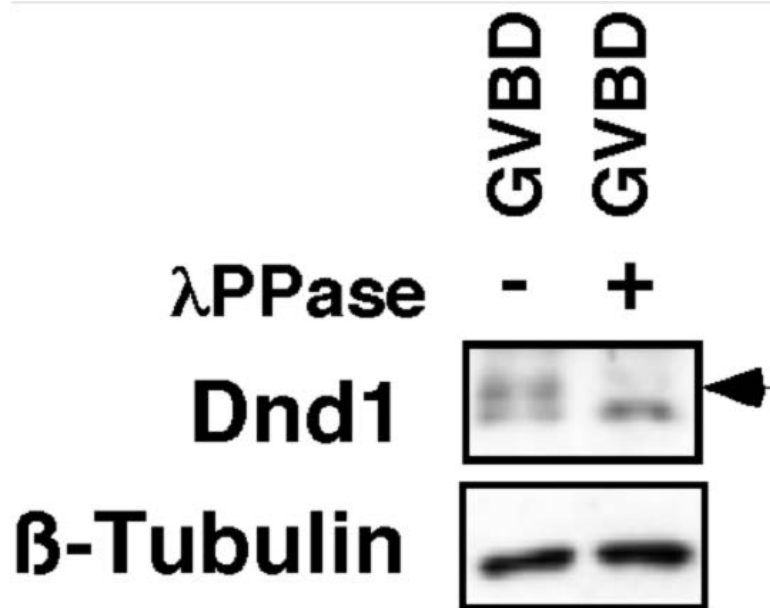

**Figure S1. Phosphorylation of Dnd1 after oocyte maturation.** (A) Western blot analysis showing the expression of endogenous Dnd1 in eggs (GVBD). Endogenous Dnd1 was enriched by IP from 50 eggs. Half of the IP sample was treated with  $\lambda$ PPase. Arrow points to a band detected by anti-Dnd1 antibody, which migrates on SDS-PAGE relatively slowly. This band collapsed after phosphatase treatment, demonstrating that this is a phosphorylated form of Dnd1.

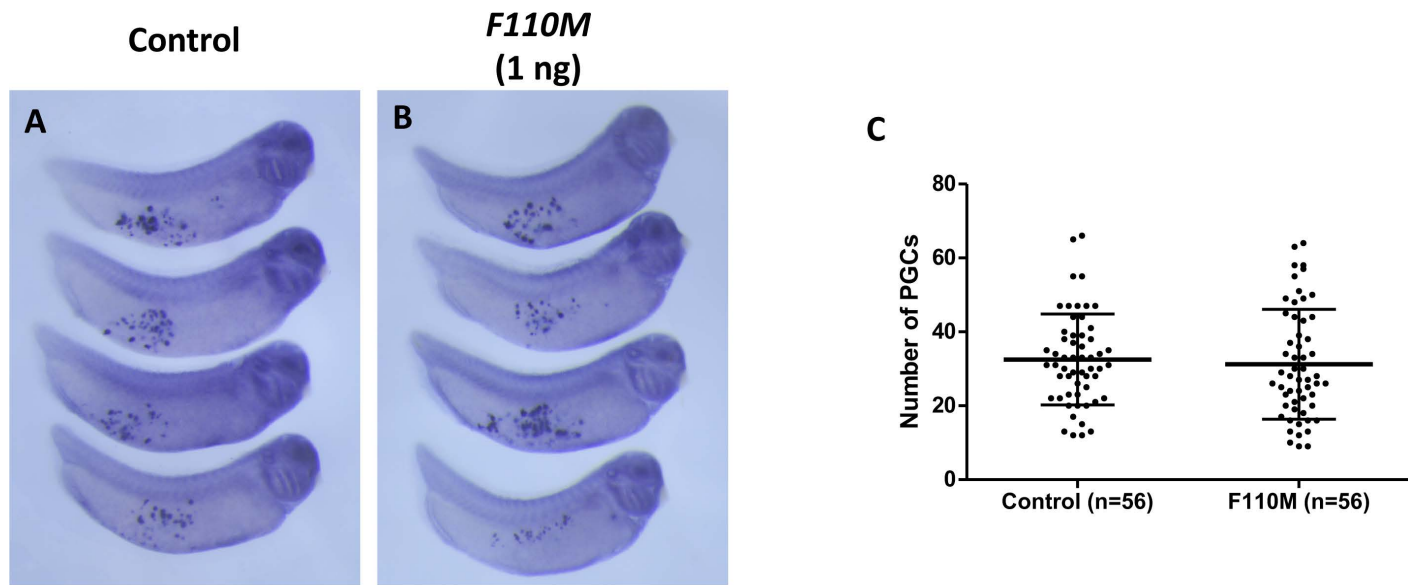

**Figure S2. Overexpression of F110M had no effect on PGC development.** (A) In situ hybridization showing the expression of *pgat* in control, and *F110M* (1 ng) injected embryos. RNA was injection into the vegetal pole at the 1-cell stage. (B) Quantification of results shown in A. The number of *pgat*-positive PGCs from each embryo was counted and plotted on the graph. There is no statistically significant difference between control and *F110M* overexpressed embryos.

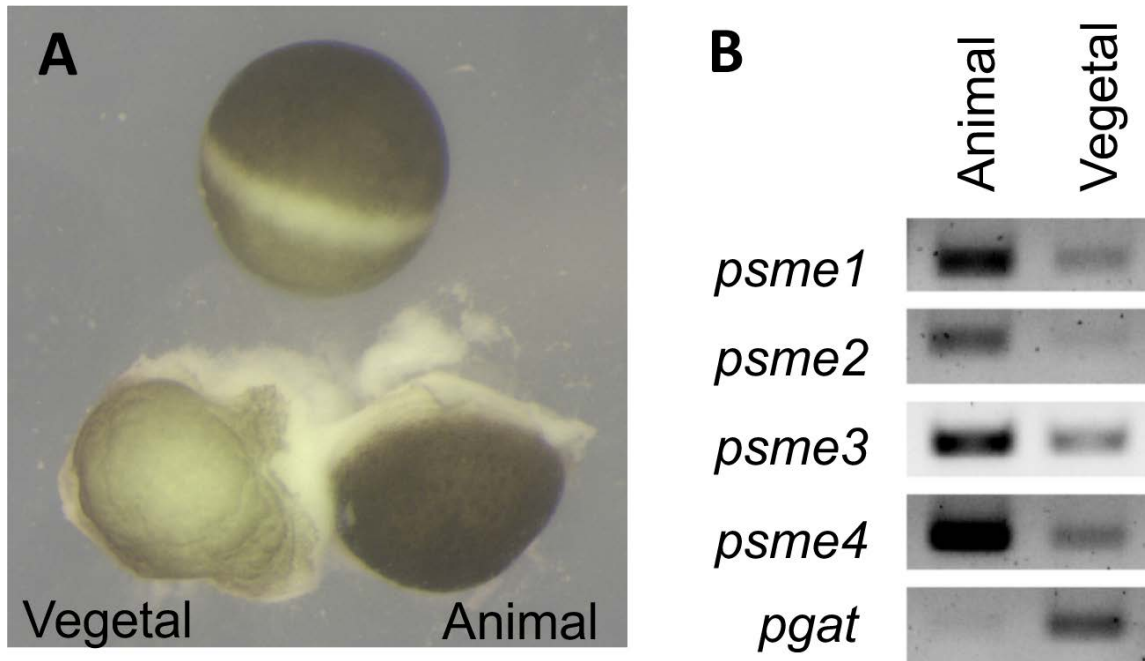

**Figure S3. Asymmetric distribution of RNAs encoding ubiquitin-independent proteasome activator.** (A) An intact stage VI oocyte and an oocyte that was dissected into animal and vegetal halves. (B) RT-PCR results showing the expression of *psme1*, *psme2*, *psme3*, *psme4*, and *pgat* in animal and vegetal halves of dissected oocytes. *pgat* was used as a marker for the vegetal hemisphere.

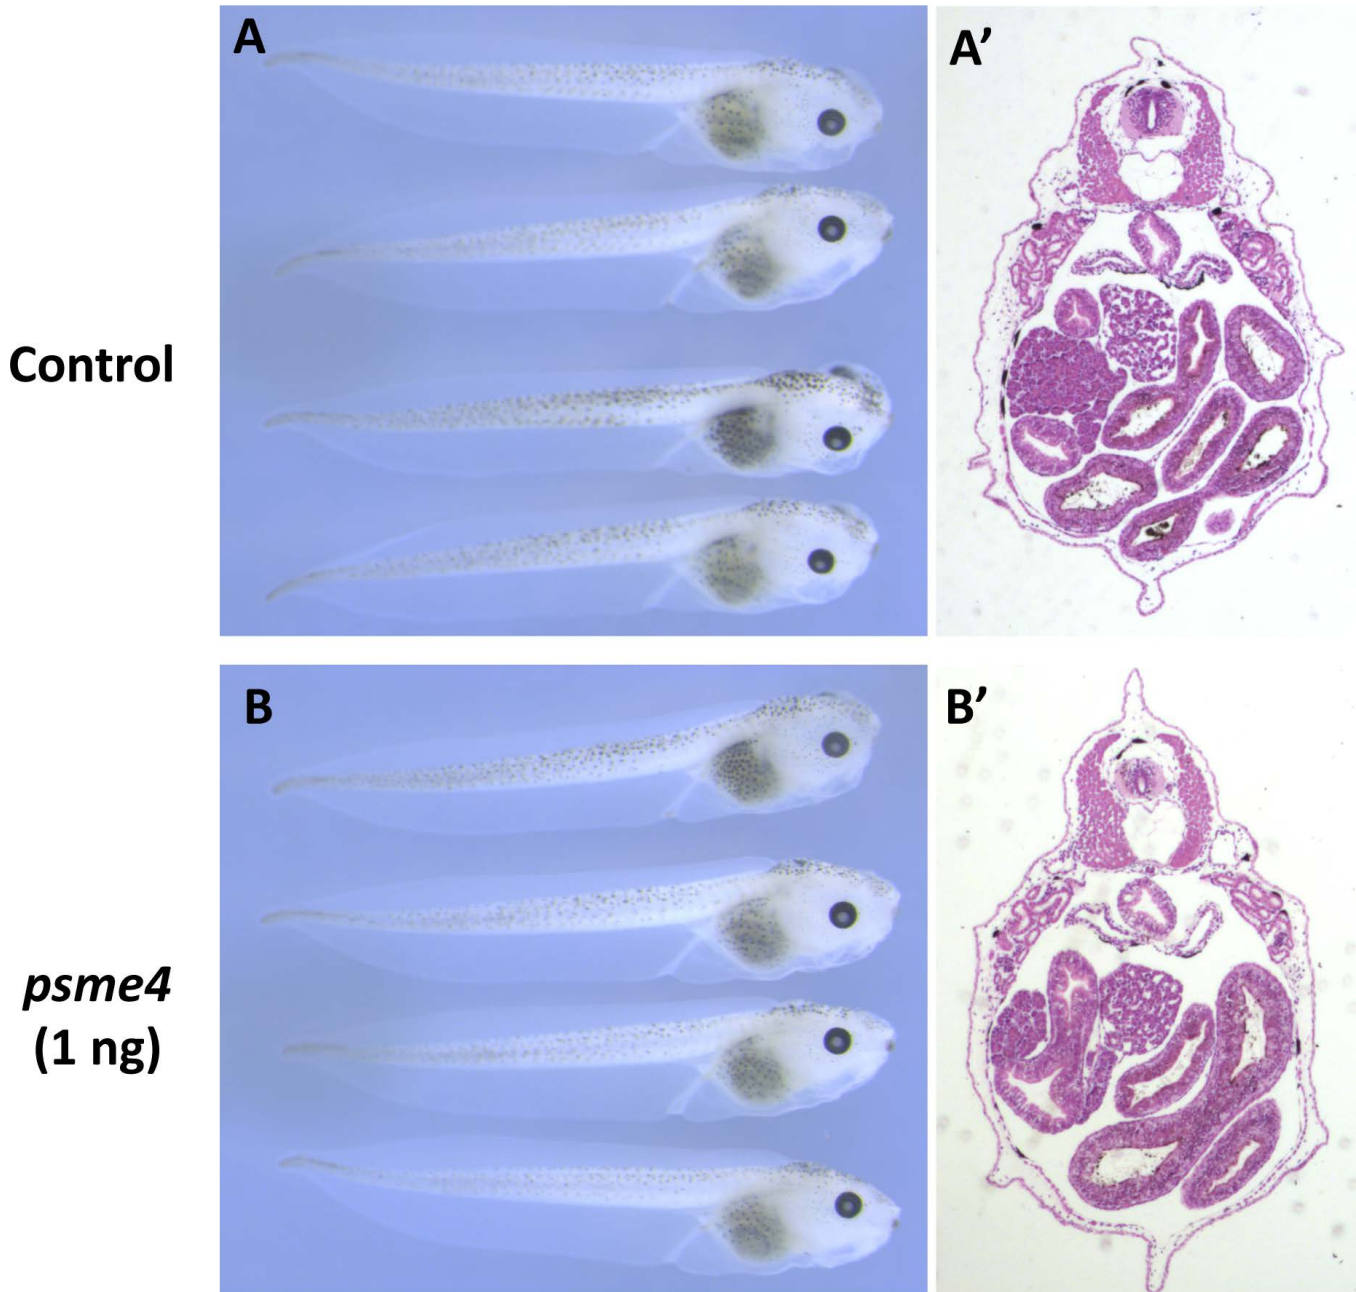

**Figure S4. Overexpression of PSME4 had no effect on somatic development.** Whole embryo morphology (**A** and **B**) and cross-section (**A'** and **B'**) of control (**A** and **A'**), and *psme4* (1 ng) injected embryos (**B** and **B'**). RNA was injection into the vegetal pole at the 1-cell stage.

**Table S1.** An excel sheet to show proteomic analysis of proteasome components in the animal and vegetal hemisphere in 1-cell stage embryos.

[Click here to Download Table S1](#)
